# Supplementary material
Source: MDPI journal article supplement (https://www.mdpi.com/2075-163X/4/1/118)
Supplement: s1 [file s1]

## Supplemental Information

**Figure S1.** Distribution of hydrogen bonds, formed by waters with the quartz surface and other waters, as a function of angle criterion  $\phi_q$ . Bulk waters within a perpendicular distance of 5 Å from the quartz surface are used to show the dependence of hydrogen bond distributions upon  $\phi_q$ . H<sub>2</sub>O-silanol distance is set to <3 Å.

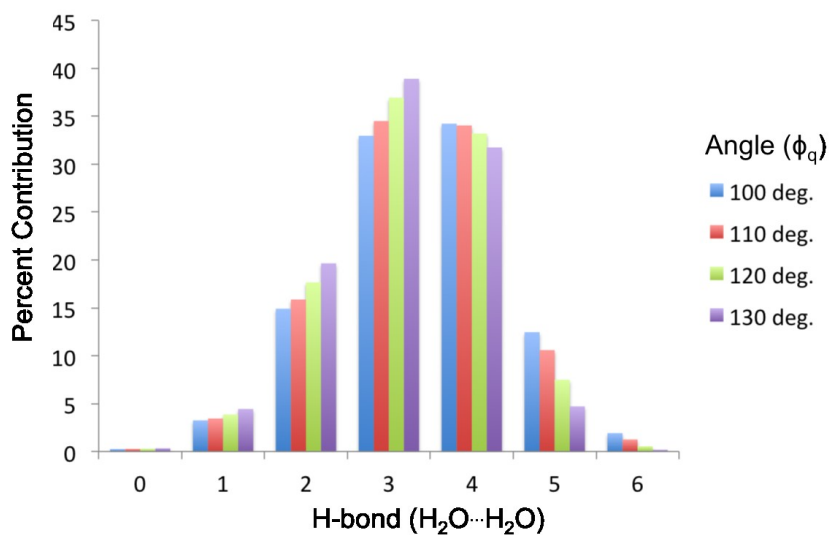

**Figure S2.** Percent of water-water H-bonds as a function of durations over the layers.

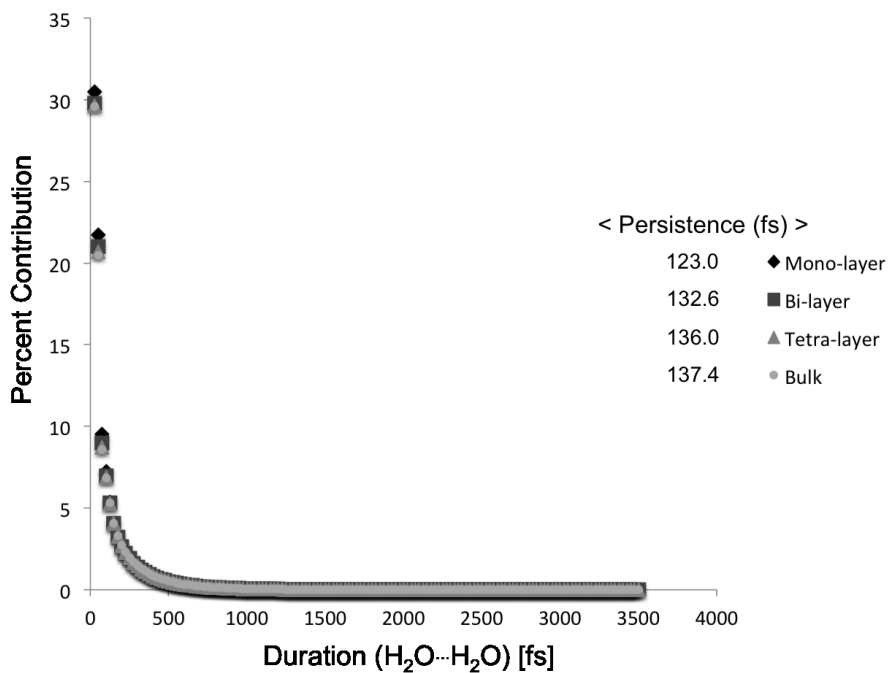

**Figure S3.** Percent of silanol-water hydrogen bonds as a function of durations over the hydration layers.

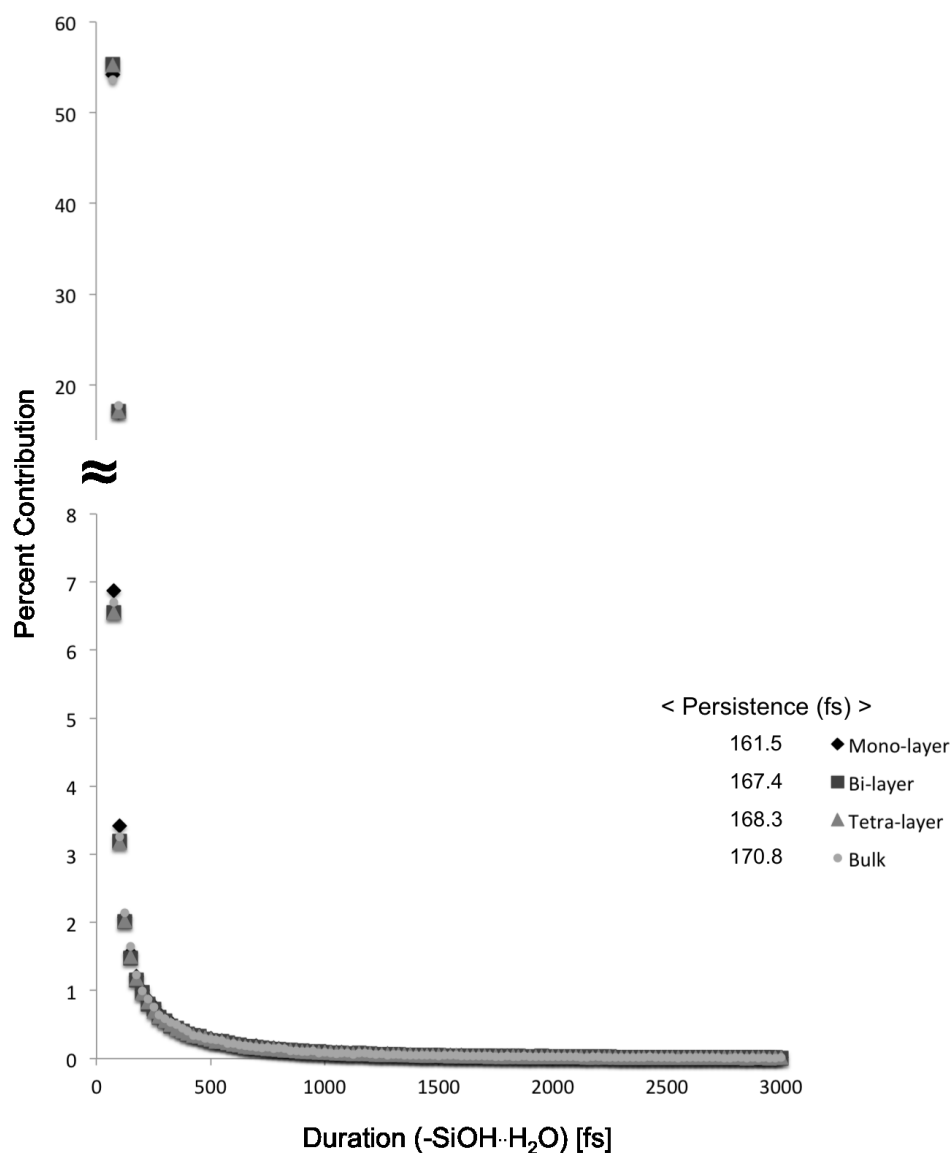

**Table S1.** Average water dipole angles ( $\alpha$  and  $\beta$ ) over the hydration levels.

| Water/Quartz interface | <Dipole angle $\alpha$ > H-bond donor | <Dipole angle $\beta$ > H-bond acceptor |
|------------------------|---------------------------------------|-----------------------------------------|
| Mono-layer             | 124.8                                 | 56.0                                    |
| Bi-layer               | 125.0                                 | 50.9                                    |
| Tetra-layer            | 125.0                                 | 50.5                                    |
| Bulk                   | 125.3                                 | 50.3                                    |
